# Supplementary figures and images for: Continuous separation of fungal spores in a microfluidic flow focusing device
Source: Royal Society of Chemistry journal article supplement (doi:10.1039/c9an00905a), 2019-01-01

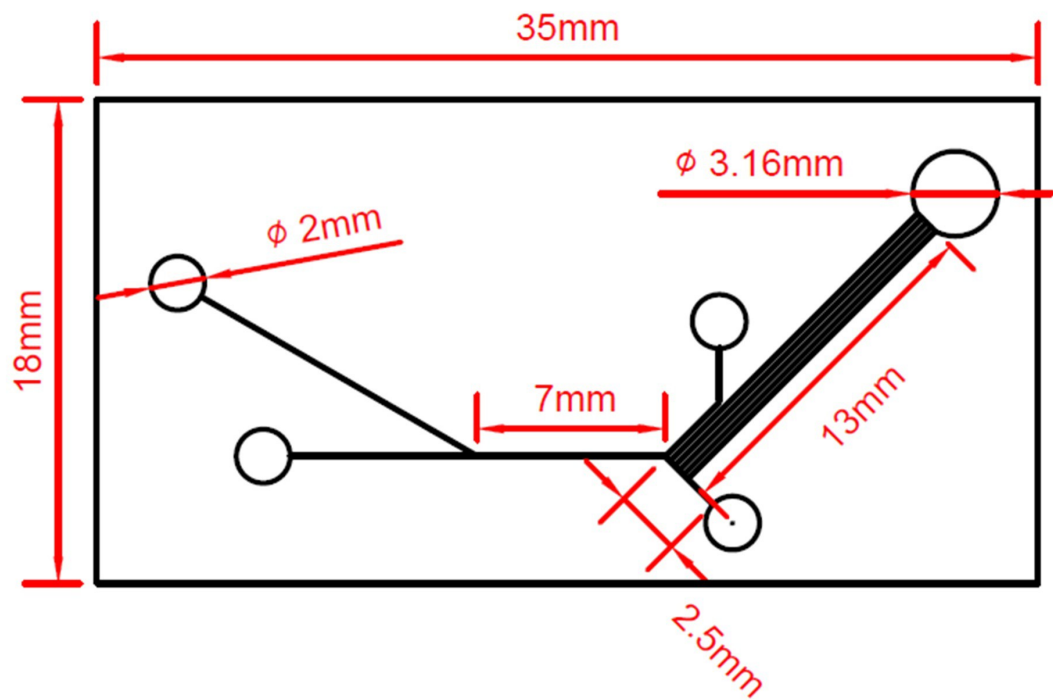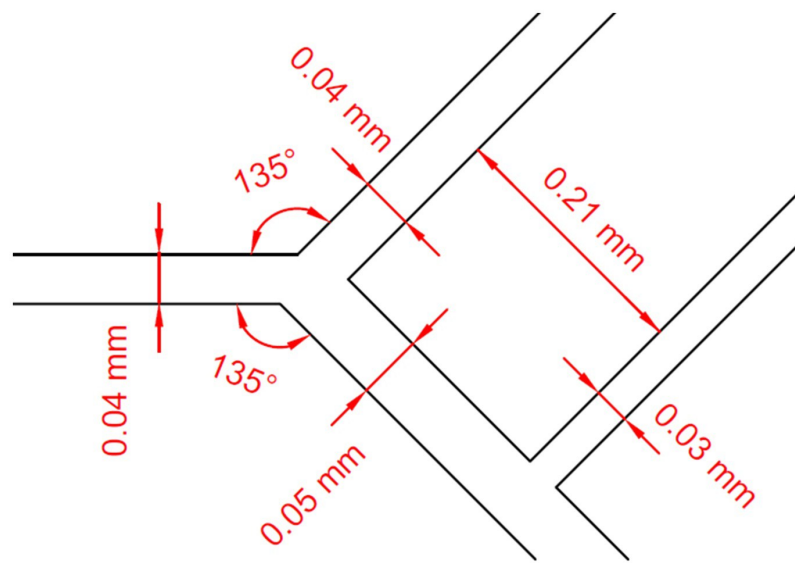

Supplement: c9an00905a3.pdf [file c9an00905a3.pdf]
